# Supplementary material for: One-step coating inverted polymer solar cells using a conjugated polymer as an electron extraction additive
Source: Royal Society of Chemistry journal article supplement (doi:10.1039/c5ta06009e), 2015-01-01
Supplement: c5ta06009e1.pdf [file c5ta06009e1.pdf]

Electronic Supporting Information for:

## One-Step Coating Inverted Polymer Solar Cells Using a Conjugated Polymer as Electron Extraction Additive†

Zuosheng Peng,<sup>a</sup> Yangdong Zhang,<sup>a</sup> Yuxin Xia,<sup>a,c</sup> Kang Xiong,<sup>a</sup> Chaosheng

Cai,<sup>a</sup> Lianpeng Xia,<sup>a</sup> Zhanhao Hu,<sup>b</sup> Kai Zhang,<sup>b</sup> Fei Huang,<sup>\*b</sup> Lintao Hou<sup>\*a</sup>

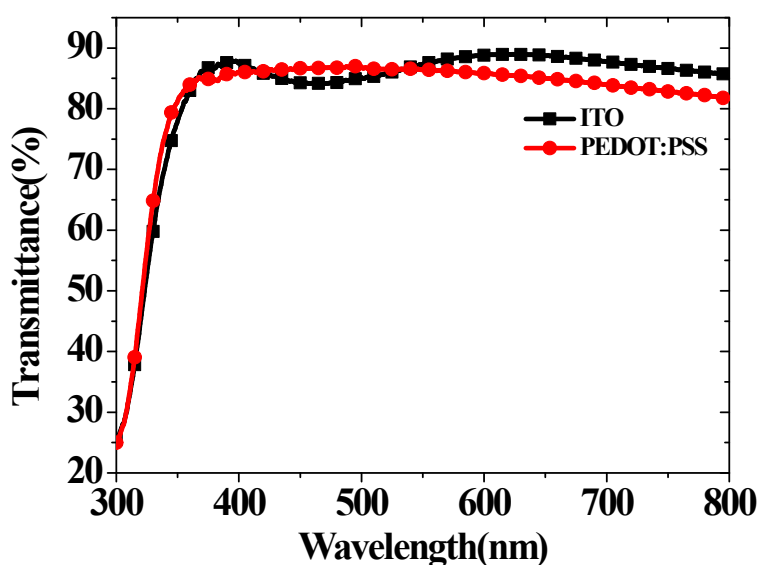

**Fig. S1** Transmittance spectra of the ITO and PEDOT:PSS films used in PSCs.

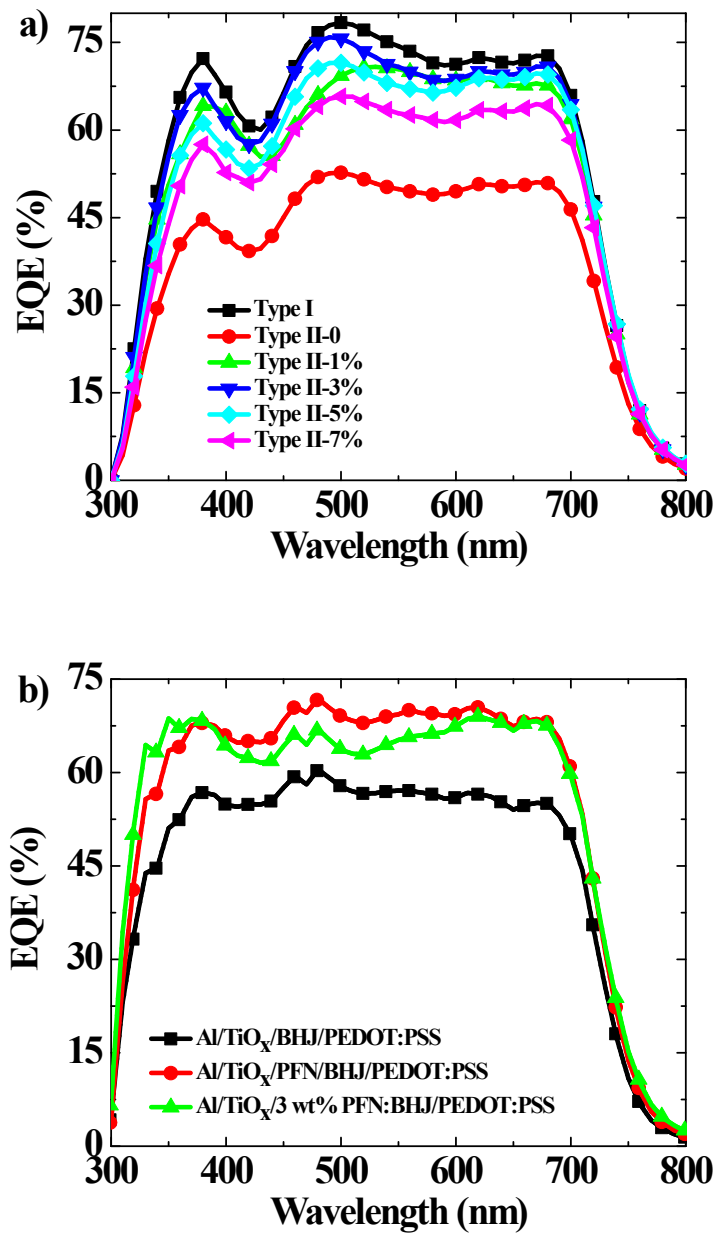

**Fig. S2** EQE curves of a) Type I and Type II devices with various PFN doping ratios (0, 1, 3, 5 and 7 wt%) and b) ITO-free inverted devices with the structure of Al/TiO<sub>x</sub>/BHJ/PEDOT:PSS, Al/TiO<sub>x</sub>/PFN/BHJ/PEDOT:PSS and Al/TiO<sub>x</sub>/3wt% PFN:BHJ/PEDOT:PSS.

## Owens Method

This method is used to calculate the solid surface energy and is based on the following model:

$$\gamma_s = \gamma_s^D + \gamma_s^P, \gamma_l = \gamma_l^D + \gamma_l^P.$$

where  $\gamma_s$  is the surface energy of the solid, which is composed of the dispersion force  $\gamma_s^D$  and polarity force  $\gamma_s^P$ . Similarly,  $\gamma_l$  is the surface energy of the liquid and consists of a dispersion force  $\gamma_l^D$  and polarity force  $\gamma_l^P$ . Then,

$$\gamma_l (1 + \cos\theta) = 2 (\gamma_s^D \gamma_l^D)^{1/2} + 2 (\gamma_s^P \gamma_l^P)^{1/2}.$$

If the surface energies  $\gamma_l^D$  and  $\gamma_l^P$  of the testing liquid are known and its contact angle on solid surface is measured, there are still two unknown quantities ( $\gamma_s^D, \gamma_s^P$ ) remaining in the formula. Therefore, to determine  $\gamma_s^D$  and  $\gamma_s^P$ , two known testing liquids are required.

$$\gamma_{l1} (1 + \cos\theta_1) = 2 (\gamma_s^D \gamma_{l1}^D)^{1/2} + 2 (\gamma_s^P \gamma_{l1}^P)^{1/2}.$$

$$\gamma_{l2} (1 + \cos\theta_2) = 2 (\gamma_s^D \gamma_{l2}^D)^{1/2} + 2 (\gamma_s^P \gamma_{l2}^P)^{1/2}.$$

After obtaining  $\gamma_s^D$  and  $\gamma_s^P$ ,  $\gamma_s$  is determined using  $\gamma_s = \gamma_s^D + \gamma_s^P$ .

**Table S1** Parameters of the testing liquids used in the surface energy measurement.

| Liquid    | Polar force<br>( $\gamma_l^P$ ) | Dispersion force<br>( $\gamma_l^D$ ) | Surface energy<br>( $\gamma_l$ ) | $\gamma_l^P/\gamma_l^D$ |
|-----------|---------------------------------|--------------------------------------|----------------------------------|-------------------------|
| Water     | 51                              | 21.8                                 | 72.8                             | 2.36                    |
| Formamide | 18.7                            | 39.5                                 | 58.2                             | 0.47                    |

**Table S2** Contact angles of water and formamide on various materials films, which were converted into the surface energy values based on Owens method.

| Solid surface  | Water contact angle | Formamide contact angle | Solid surface energy (mN/m) |
|----------------|---------------------|-------------------------|-----------------------------|
| PFN            | 79°                 | 11°                     | 49.8                        |
| PCBM[70]       | 85°                 | 70°                     | 25.9                        |
| PTB7           | 97°                 | 81°                     | 18.7                        |
| BHJ            | 95°                 | 80.5°                   | 19.1                        |
| PFN(3 wt%):BHJ | 95°                 | 80°                     | 19.0                        |

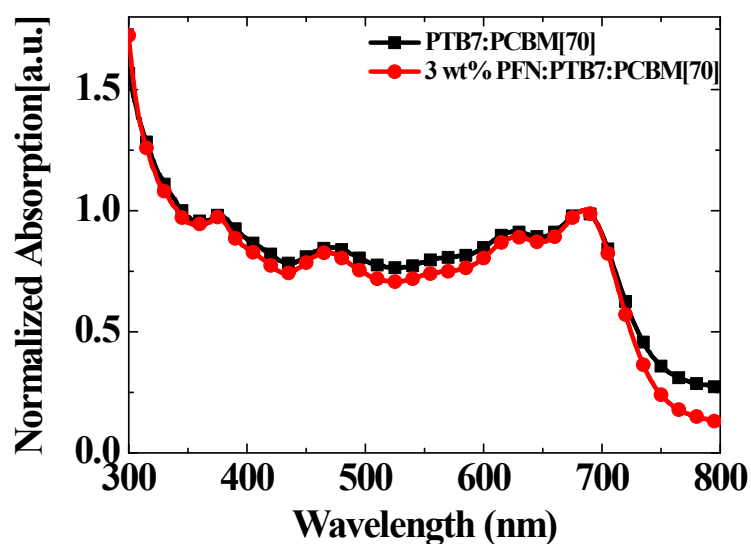

**Fig. S3** Normalized absorption spectra of PTB7:PCBM[70] and PFN(3 wt%):PTB7:PCBM[70] films.
